# Supplementary material
Source: HighWire-hosted journal article supplement (https://www.annfammed.org/highwire/filestream/745/field_highwire_adjunct_files/0/Reves_Supp_App.pdf)
Supplement: Reves_Supp_App.pdf [file Reves_Supp_App.pdf]

**Supplemental materials for:**

Reves SR, O'Neal J, Gonzalez MM, McHenry C, Favour M, Etz RS. A 60-second survey to identify patients' unmet social needs. *Ann Fam Med*. 2019;17(3):274.

**References**

1. Marmot M. Social determinants of health inequalities. *Lancet*. 2005;365(9464):1099-1104.
2. Page-Reeves J, Kaufman W, Bleecker M, et al. Addressing social determinants of health in a clinic setting: the WellRx pilot in Albuquerque, New Mexico. *J Am Board Fam Med*. 2016;29(3):414-418.
